# Supplementary material for: Investigating the links between ozone and organic aerosol chemistry in a biomass burning plume from a prescribed fire in California chaparral
Source: Copernicus journal article supplement (doi:10.5194/acp-15-6667-2015), 2015-06-17
Supplement: Supplementary file 1 [file acp-15-6667-2015-supplement.zip]

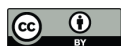

## *Supplement of*

# **Investigating the links between ozone and organic aerosol chemistry in a biomass burning plume from a prescribed fire in California chaparral**

**M. J. Alvarado et al.**

*Correspondence to:* M. J. Alvarado (malvarad@aer.com)

- acp-15-6667-2015-supplement-cover-letter.pdf
- \_\_MACOSX
  - .\_acpd-14-32427-2014-supplement
  - acpd-14-32427-2014-supplement
    - \* .\_AerosolThermoKusikMeissner.in
    - \* .\_AqEquilibriumReactions.in
    - \* .\_AqPhaseChems.in
    - \* .\_AqPhaseIons.in
    - \* .\_GasChemicalMechanism.in
    - \* .\_GasPhaseChems.in
    - \* .\_HydrophilicOrgChems.in
    - \* .\_HydrophilicOrganicDissolution.in
    - \* .\_OrgPhaseChems.in
    - \* .\_OrganicDissolution.in
    - \* .\_README
    - \* .\_acpd-14-32427-2014-supplement-cover-letter.pdf
- acpd-14-32427-2014-supplement
  - AerosolThermoKusikMeissner.in
  - AqEquilibriumReactions.in
  - AqPhaseChems.in
  - AqPhaseIons.in
  - GasChemicalMechanism.in
  - GasPhaseChems.in
  - HydrophilicOrgChems.in
  - HydrophilicOrganicDissolution.in

- [OrgPhaseChems.in](#)
- [OrganicDissolution.in](#)
- [P1704-Williams-fire-paper-supplemental-tables.pdf](#)
- [README](#)
- [acpd-14-32427-2014-supplement-cover-letter.pdf](#)

The copyright of individual parts of the supplement might differ from the CC-BY 3.0 licence.
