# Supplementary material for: Investigating the links between ozone and organic aerosol chemistry in a biomass burning plume from a prescribed fire in California chaparral
Source: Copernicus journal article supplement (doi:10.5194/acp-15-6667-2015), 2015-06-17
Supplement: Supplementary file 2 [file acp-15-6667-2015-supplement.zip]

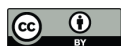

## *Supplement of*

# **Investigating the links between ozone and organic aerosol chemistry in a biomass burning plume from a prescribed fire in California chaparral**

**M. J. Alvarado et al.**

*Correspondence to:* M. J. Alvarado (malvarad@aer.com)

- [acpd-14-32427-2014-supplement-cover-letter.pdf](#)
- [AerosolThermoKusikMeissner.in](#)
- [AqEquilibriumReactions.in](#)
- [AqPhaseChems.in](#)
- [AqPhaseIons.in](#)
- [GasChemicalMechanism.in](#)
- [GasPhaseChems.in](#)
- [HydrophilicOrgChems.in](#)
- [HydrophilicOrganicDissolution.in](#)
- [OrgPhaseChems.in](#)
- [OrganicDissolution.in](#)
- [README](#)
