# Supplementary material for: Investigating the links between ozone and organic aerosol chemistry in a biomass burning plume from a prescribed fire in California chaparral
Source: Copernicus journal article supplement (doi:10.5194/acp-15-6667-2015), 2015-06-17
Supplement: Supplementary file 4 [file acp-15-6667-2015-supplement.zip]

1 Table S1. Initial Temperatures (T, in K) and mixing ratios (ppbv) used for the EPA Chamber  
2 Simulations. Note HONO initial concentration is set at 0.05 ppbv for all runs. PRO = propene,  
3 t-BUT = trans-2-butene, BUT = n-butane, OCT = octane, TOL = toluene, and XYL = m-  
4 xylene.

5

| Case | T     | NO    | NO <sub>2</sub> | CO    | HCHO   | C <sub>2</sub> H <sub>4</sub> | PRO   | t-BUT | BUT   | OCT   | TOL   | XYL   |
|------|-------|-------|-----------------|-------|--------|-------------------------------|-------|-------|-------|-------|-------|-------|
| 96A  | 303.9 | 64.13 | 45.14           | 0     | 21.73  | 12.29                         | 9.907 | 7.779 | 62.03 | 16.15 | 15.96 | 15.13 |
| 96B  | 303.9 | 64.25 | 46.83           | 0     | 21.66  | 12.29                         | 9.907 | 7.779 | 62.03 | 16.15 | 15.96 | 15.13 |
| 97A  | 303.7 | 3.107 | 2.175           | 0     | 12.2   | 8.386                         | 7.605 | 6.649 | 52    | 11.16 | 10.59 | 9.833 |
| 97B  | 303.7 | 3.168 | 2.039           | 0     | 12.05  | 8.208                         | 7.566 | 6.513 | 52    | 11.28 | 10.65 | 10.08 |
| 80A  | 303.6 | 62.54 | 29.69           | 0     | 112.3  | 76.64                         | 61.63 | 58.43 | 365.7 | 96.88 | 90.98 | 86.35 |
| 80B  | 303.6 | 62.54 | 29.69           | 0     | 112.3  | 76.64                         | 61.63 | 58.43 | 365.7 | 96.88 | 90.98 | 86.35 |
| 81A  | 303.5 | 33.47 | 16.43           | 0     | 59.27  | 41.41                         | 31.91 | 29.46 | 187.1 | 60.08 | 50.47 | 46.97 |
| 81B  | 303.5 | 33.5  | 16.51           | 0     | 59.01  | 41.42                         | 32.23 | 29.31 | 185.7 | 60.08 | 49.91 | 46.7  |
| 128A | 302.6 | 30.59 | 17.03           | 0     | 10.98  | 8.751                         | 8.258 | 7.124 | 53.93 | 12.17 | 11.67 | 11.57 |
| 83A  | 303.5 | 31.69 | 16.17           | 20.67 | 18.32  | 26.02                         | 14.68 | 12.97 | 88.29 | 24    | 20.23 | 19.19 |
| 84B  | 303.5 | 33.61 | 17.51           | 20.67 | 24.72  | 16.34                         | 16.79 | 15.32 | 100.4 | 29    | 24.23 | 22.94 |
| 110B | 303.4 | 19.57 | 11.91           | 20.67 | 0      | 9.763                         | 8.834 | 7.81  | 58.71 | 12.99 | 12.43 | 12.7  |
| 114A | 302.7 | 19.88 | 10.9            | 20.67 | 21     | 8.219                         | 7.473 | 6.664 | 50.45 | 12.67 | 11.9  | 11.51 |
| 127B | 302.8 | 18.65 | 10.37           | 20.67 | 11.82  | 8.636                         | 8.025 | 6.791 | 52.78 | 11.88 | 11.33 | 11.18 |
| 137A | 303.4 | 18.29 | 10.28           | 20.67 | 11.01  | 8.845                         | 8.476 | 7.335 | 55.43 | 12.17 | 11.35 | 13.29 |
| 143A | 303.5 | 18.41 | 10.26           | 20.67 | 0.1523 | 8.688                         | 8.126 | 6.791 | 51.84 | 11.48 | 10.95 | 10.84 |
| 143B | 303.5 | 18.5  | 10.3            | 20.67 | 0      | 8.782                         | 8.134 | 7.053 | 52.82 | 11.89 | 11.39 | 11.21 |
| 151B | 303.7 | 18.23 | 11.39           | 20.67 | 10.12  | 8.292                         | 7.683 | 6.77  | 50.22 | 12.66 | 11.57 | 11.95 |
| 163B | 303.9 | 14.87 | 8.699           | 20.67 | 10.79  | 7.781                         | 7.341 | 6.468 | 48.11 | 11.94 | 11.51 | 11.29 |
| 167A | 304.1 | 18.02 | 11.05           | 20.67 | 10.87  | 8.48                          | 8.111 | 7.113 | 52.25 | 12.31 | 11.57 | 11.64 |
| 168B | 303.9 | 18.16 | 10.83           | 20.67 | 10.87  | 8.677                         | 8.168 | 6.921 | 51.06 | 12.09 | 11.26 | 11.62 |
| 226A | 304.7 | 19.56 | 11.3            | 45.65 | 0      | 9.064                         | 8.274 | 8.5   | 47.09 | 13.15 | 12.89 | 12.73 |
| 226B | 304.7 | 19.5  | 11.37           | 41.32 | 0      | 9.22                          | 8.481 | 8.849 | 47.81 | 13.46 | 13.05 | 13.37 |
| 229B | 303.3 | 20.18 | 11.62           | 41.32 | 0      | 10.26                         | 9.799 | 9.776 | 56.15 | 15.27 | 14.1  | 15.51 |
| 230A | 302.6 | 20.68 | 12.53           | 41.32 | 0      | 9.08                          | 8.81  | 9.089 | 50.51 | 14.29 | 13.25 | 14    |
| 100A | 303.6 | 3.07  | 2.254           | 41.32 | 9.2    | 5.34                          | 4.65  | 3.885 | 35    | 6.899 | 5.851 | 5.581 |
| 180B | 304.8 | 31.64 | 19.92           | 41.32 | 33     | 34.38                         | 32.62 | 34.36 | 186.6 | 51.03 | 48.85 | 47.51 |
| 181B | 305.1 | 13.17 | 10.8            | 41.32 | 32     | 35.49                         | 32.88 | 34.78 | 188.1 | 47.84 | 45.71 | 44.52 |
| 182B | 304.6 | 30.15 | 22.52           | 41.32 | 15     | 18.16                         | 16.85 | 17.89 | 98.27 | 23.83 | 22.59 | 22.21 |
| 188B | 304.4 | 7.546 | 6.216           | 41.32 | 8      | 8.663                         | 8.183 | 8.404 | 49.4  | 11.87 | 11.27 | 11.07 |
| 189B | 302.0 | 7.754 | 5.641           | 41.32 | 16.5   | 16.94                         | 15.63 | 16.35 | 91.4  | 21.89 | 20.93 | 20.17 |
| 190B | 304.4 | 63.32 | 34.07           | 41.32 | 10.5   | 8.578                         | 7.998 | 8.121 | 49.63 | 12.94 | 12.43 | 12    |
| 191B | 301.8 | 8.104 | 4.7             | 41.32 | 4      | 4.211                         | 4.15  | 4.184 | 27.14 | 6.464 | 6.162 | 6.154 |
| 192B | 304.0 | 3.916 | 3.08            | 41.32 | 6      | 8.259                         | 7.881 | 8.252 | 48.32 | 10.46 | 9.853 | 9.844 |
| 193B | 304.4 | 32    | 15.67           | 41.32 | 4      | 4.619                         | 4.461 | 4.337 | 28.08 | 6.068 | 5.762 | 5.749 |
| 197B | 304.9 | 64.16 | 39.59           | 41.32 | 43     | 34.03                         | 31.52 | 33.29 | 183   | 44.37 | 42.29 | 41.4  |
| 113A | 303.1 | 44.42 | 24.84           | 41.32 | 0      | 16.32                         | 14.88 | 12.91 | 91.75 | 24    | 22.9  | 22.59 |
| 180A | 304.8 | 31.61 | 20.22           | 41.32 | 33     | 34.38                         | 32.62 | 34.36 | 186.6 | 51.03 | 48.85 | 47.51 |

1 Table S2. Off-gassing, wall reaction, and selected photolysis rates used for the EPA Chamber  
2 Simulations.

| Reaction                                                                   | Rate (s <sup>-1</sup> )             |
|----------------------------------------------------------------------------|-------------------------------------|
| OffGas → HONO                                                              | 5.5424×10 <sup>-8</sup> (Chamber A) |
| OffGas → HONO                                                              | 3.6805×10 <sup>-8</sup> (Chamber B) |
| OffGas → HCHO                                                              | 8.33×10 <sup>-8</sup>               |
| O <sub>3</sub> → Wall O <sub>3</sub>                                       | 1.8×10 <sup>-6</sup>                |
| NO <sub>2</sub> → 0.2 HONO + 0.8 Wall NO <sub>x</sub>                      | 2.67×10 <sup>-6</sup>               |
| N <sub>2</sub> O <sub>5</sub> → Wall NO <sub>x</sub>                       | 4.67×10 <sup>-5</sup>               |
| NO <sub>2</sub> → NO + O                                                   | 4.333×10 <sup>-3</sup>              |
| O <sub>3</sub> → O <sup>1D</sup> + O <sub>2</sub>                          | 2.947×10 <sup>-6</sup>              |
| O <sub>3</sub> → O + O <sub>2</sub>                                        | 8.6667×10 <sup>-4</sup>             |
| HONO → 0.9 OH + 0.9 NO + 0.1 HO <sub>2</sub> + 0.1 NO <sub>2</sub>         | 8.6667×10 <sup>-4</sup>             |
| NO <sub>3</sub> → NO + O <sub>2</sub>                                      | 8.233×10 <sup>-3</sup>              |
| HCHO → HO <sub>2</sub> + HO <sub>2</sub> + CO                              | 4.767×10 <sup>-6</sup>              |
| Acetaldehyde → CH <sub>3</sub> O <sub>2</sub> + HO <sub>2</sub> + CO       | 5,776×10 <sup>-7</sup>              |
| Acetone → CH <sub>3</sub> CO <sub>3</sub> + CH <sub>3</sub> O <sub>2</sub> | 4.767×10 <sup>-8</sup>              |
| MGLY → CH <sub>3</sub> CO <sub>3</sub> + CO + HO <sub>2</sub>              | 6.5×10 <sup>-5</sup>                |

Table S3. Initial and background trace gas concentrations for the ASP simulations of the Williams Fire smoke plume. Only compounds with non-zero values are listed. “GEOS-Chem” refers to the GEOS-Chem model output from the study of Fischer et al., 2014.

| Species                               | Initial Conc.<br>(ppbv) | Background Conc.<br>(ppbv) | Initial Conc.<br>Source                                     | Background Conc.<br>Source |
|---------------------------------------|-------------------------|----------------------------|-------------------------------------------------------------|----------------------------|
| CO                                    | 1.00E+04                | 1.29E+02                   | Akagi et al., 2012                                          | -                          |
| CO <sub>2</sub>                       | 5.28E+05                | 3.90E+05                   | Akagi et al., 2012                                          | Approximate                |
| Trace                                 | 1.00E+03                | 0.00E+00                   | -                                                           | -                          |
| NO                                    | 1.14E+02                | 1.50E-02                   | Akagi et al., 2012                                          | GEOS-Chem                  |
| NO <sub>2</sub>                       | 2.27E+02                | 3.90E-02                   | Akagi et al., 2012                                          | GEOS-Chem                  |
| O <sub>3</sub>                        | 0.00E+00                | 5.00E+01                   | Akagi et al., 2012                                          | Akagi et al., 2012         |
| H <sub>2</sub> O <sub>2</sub>         | 7.55E-01                | 7.55E-01                   | -                                                           | GEOS-Chem                  |
| HONO                                  | 3.95E+01                | 0.00E+00                   | Akagi et al., 2012                                          | -                          |
| SO <sub>2</sub>                       | 3.79E+01                | 1.20E-01                   | Akagi et al., 2011<br>(chaparral)                           | GEOS-Chem                  |
| HNO <sub>3</sub>                      | 4.10E-01                | 4.10E-01                   | -                                                           | GEOS-Chem                  |
| H <sub>2</sub> SO <sub>4</sub>        | 1.00E-04                | 0.00E+00                   | -                                                           | -                          |
| HCl                                   | 1.95E+01                | 1.00E-05                   | Akagi et al., 2011<br>(chaparral)                           | -                          |
| NH <sub>3</sub>                       | 3.79E+02                | 9.60E-04                   | Akagi et al., 2012                                          | GEOS-Chem                  |
| H <sub>2</sub>                        | 3.74E+03                | 1.00E-05                   | Akagi et al., 2011<br>(savannah)                            | -                          |
| <b>C<sub>1</sub> Parent Compounds</b> |                         |                            |                                                             |                            |
| CH <sub>4</sub>                       | 2.76E+03                | 1.90E+03                   | Akagi et al., 2012                                          | Approximate                |
| HCHO                                  | 1.63E+02                | 3.30E-01                   | Akagi et al., 2012                                          | GEOS-Chem                  |
| Methanol                              | 1.65E+02                | 0.00E+00                   | Akagi et al., 2012                                          | -                          |
| Formic Acid                           | 6.50E+00                | 0.00E+00                   | Akagi et al., 2012                                          | -                          |
| HCN                                   | 1.28E+02                | 0.00E+00                   | Akagi et al., 2012                                          | -                          |
| <b>C<sub>2</sub> Parent Compounds</b> |                         |                            |                                                             |                            |
| Ethylene                              | 1.26E+02                | 0.00E+00                   | Akagi et al., 2012                                          | -                          |
| Ethane                                | 5.28E+01                | 0.00E+00                   | Akagi et al., 2011<br>(chaparral)                           | -                          |
| Acetaldehyde                          | 5.70E+01                | 0.00E+00                   | Akagi et al., 2011<br>(savannah)                            | -                          |
| Ethanol                               | 9.87E-01                | 0.00E+00                   | Andreae and Merlet,<br>2001 with 2009 updates<br>(savannah) | -                          |
| Acetic Acid                           | 1.39E+02                | 0.00E+00                   | Akagi et al., 2012                                          | -                          |
| Glyoxal                               | 8.52E+01                | 0.00E+00                   | Andreae and Merlet,<br>2001 with 2009 updates<br>(savannah) | -                          |
| Acetylene                             | 2.68E+01                | 0.00E+00                   | Akagi et al., 2012                                          | -                          |

| <b>C<sub>3</sub> Parent Compounds</b> |          |          |                                                             |   |
|---------------------------------------|----------|----------|-------------------------------------------------------------|---|
| Propene                               | 4.74E+01 | 0.00E+00 | Akagi et al., 2012                                          | - |
| Propane                               | 1.78E+01 | 0.00E+00 | Akagi et al., 2011<br>(chaparral)                           | - |
| Acrolein                              | 5.92E+00 | 0.00E+00 | Andreae and Merlet,<br>2001 with 2009 updates<br>(savannah) | - |
| Propanal                              | 6.42E-01 | 0.00E+00 | Andreae and Merlet,<br>2001 with 2009 updates<br>(savannah) | - |
| Acetone                               | 1.21E+01 | 0.00E+00 | Akagi et al., 2011<br>(savannah)                            | - |
| n-Propanol                            | 1.84E+00 | 0.00E+00 | Andreae and Merlet,<br>2001 with 2009 updates<br>(savannah) | - |
| Methyl Glyoxal                        | 4.47E+01 | 0.00E+00 | Andreae and Merlet,<br>2001 with 2009 updates<br>(savannah) | - |
| <b>C<sub>4</sub> Parent Compounds</b> |          |          |                                                             |   |
| Butadiene                             | 4.23E+00 | 0.00E+00 | Akagi et al., 2011<br>(savannah)                            | - |
| 1-Butene                              | 3.34E+00 | 0.00E+00 | Akagi et al., 2011<br>(savannah)                            | - |
| cis-2-Butene                          | 6.80E-01 | 0.00E+00 | Akagi et al., 2011<br>(savannah)                            | - |
| trans-2-Butene                        | 8.55E-01 | 0.00E+00 | Akagi et al., 2011<br>(savannah)                            | - |
| i-Butene                              | 1.89E+00 | 0.00E+00 | Akagi et al., 2011<br>(savannah)                            | - |
| n-Butane                              | 9.87E+00 | 0.00E+00 | Akagi et al., 2011<br>(chaparral)                           | - |
| i-Butane                              | 3.23E-01 | 0.00E+00 | Akagi et al., 2011<br>(savannah)                            | - |
| Butanal                               | 3.34E+00 | 0.00E+00 | Andreae and Merlet,<br>2001 with 2009 updates<br>(savannah) | - |
| MEK                                   | 1.53E+01 | 0.00E+00 | Andreae and Merlet,<br>2001 with 2009 updates<br>(savannah) | - |
| n-Butanol                             | 5.00E-01 | 0.00E+00 | Andreae and Merlet,<br>2001 with 2009 updates<br>(savannah) | - |
| <b>Lumped Parent Compounds</b>        |          |          |                                                             |   |
| FURAN                                 | 2.02E+01 | 0.00E+00 | Akagi et al., 2012                                          | - |
| ISOP                                  | 2.53E+00 | 0.00E+00 | Akagi et al., 2011<br>(savannah)                            | - |

|                                 |          |          |                                                             |           |
|---------------------------------|----------|----------|-------------------------------------------------------------|-----------|
| ALD                             | 7.22E-01 | 2.00E-02 | Andreae and Merlet,<br>2001 with 2009 updates<br>(savannah) | GEOS-Chem |
| API                             | 3.26E+01 | 0.00E+00 | Akagi et al., 2013                                          | -         |
| BALD                            | 1.25E+00 | 0.00E+00 | Andreae and Merlet,<br>2001 with 2009 updates<br>(savannah) | -         |
| BEN                             | 1.11E+01 | 0.00E+00 | Akagi et al., 2011<br>(savannah)                            |           |
| DIEN                            | 1.20E+00 | 0.00E+00 | Andreae and Merlet,<br>2001 with 2009 updates<br>(savannah) |           |
| HC <sub>5</sub>                 | 2.38E+00 | 1.08E+00 | Akagi et al., 2011<br>(savannah)                            | GEOS-Chem |
| KET                             | 1.58E+00 | 0.00E+00 | Andreae and Merlet,<br>2001 with 2009 updates<br>(savannah) |           |
| LIM                             | 3.26E+01 | 0.00E+00 | Akagi et al., 2013                                          | -         |
| OLI                             | 2.14E+00 | 0.00E+00 | Akagi et al., 2011<br>(savannah)                            |           |
| OLT                             | 8.75E-01 | 0.00E+00 | Akagi et al., 2011<br>(savannah)                            |           |
| PHEN                            | 1.46E+01 | 0.00E+00 | Akagi et al., 2012                                          | -         |
| ROH                             | 1.70E+00 | 0.00E+00 | Andreae and Merlet,<br>2001 with 2009 updates<br>(savannah) |           |
| TOL                             | 4.07E+00 | 0.00E+00 | Akagi et al., 2011<br>(savannah)                            |           |
| XYM                             | 3.15E-01 | 0.00E+00 | Akagi et al., 2011<br>(savannah)                            |           |
| XYP                             | 8.59E-02 | 0.00E+00 | Akagi et al., 2011<br>(savannah)                            |           |
| XYO                             | 1.62E-01 | 0.00E+00 | Akagi et al., 2011<br>(savannah)                            |           |
| <b>Highly oxygenated VOCs</b>   |          |          |                                                             |           |
| HOCH <sub>2</sub> CHO           | 1.85E-01 | 0.00E+00 | Akagi et al., 2012                                          | -         |
| ACETOL                          | 2.68E+01 | 0.00E+00 | Akagi et al., 2011<br>(savannah)                            | -         |
| BIACET                          | 2.79E+01 | 0.00E+00 | Andreae and Merlet,<br>2001 with 2009 updates<br>(savannah) | -         |
| <b>Organic Nitrates</b>         |          |          |                                                             |           |
| PAN                             | 6.61E+00 | 3.00E-02 | Akagi et al., 2012                                          | GEOS-Chem |
| PPN                             | 3.20E-03 | 3.20E-03 | GEOS-Chem                                                   | GEOS-Chem |
| CH <sub>3</sub> NO <sub>3</sub> | 2.91E-02 | 0.00E+00 | Akagi et al., 2011<br>(savannah)                            | -         |

| VBS compounds     |          |          |                                               |   |  |
|-------------------|----------|----------|-----------------------------------------------|---|--|
| SVOC <sub>3</sub> | 2.60E-03 | 0.00E+00 | Grieshop et al., 2009a <sup>a</sup>           | - |  |
| SVOC <sub>4</sub> | 4.37E-02 | 0.00E+00 | Grieshop et al., 2009a <sup>a</sup>           | - |  |
| SVOC <sub>5</sub> | 1.20E+00 | 0.00E+00 | Grieshop et al., 2009a <sup>a</sup>           | - |  |
| SVOC <sub>6</sub> | 1.03E+01 | 0.00E+00 | Grieshop et al., 2009a <sup>a</sup>           | - |  |
| SVOC <sub>7</sub> | 9.31E+00 | 0.00E+00 | Grieshop et al., 2009a <sup>a</sup>           | - |  |
| SVOC <sub>8</sub> | 2.17E+02 | 0.00E+00 | Akagi et al., 2011 <sup>b</sup><br>(savannah) |   |  |

<sup>a</sup> The POA volatility distribution of Grieshop et al. (2009a) is used for the relative total mass fractions of these species, as described in the text and shown in Table 1.

<sup>b</sup> Derived from the Akagi et al. (2011) estimate of the emissions of unidentified NMOCs in Savannah fire smoke, as described in the text and shown in Table 1.

Table S4. Initial and background aerosol mass concentrations for the ASP simulations of the Williams Fire smoke plume. Only compounds with non-zero values are listed. Italics is used for compounds that are components of modeled OA.

| Species                 | Initial Conc. ( $\mu\text{g}/\text{m}^3$ ) <sup>a</sup> | Background Conc. ( $\mu\text{g}/\text{m}^3$ ) <sup>a</sup> | Initial Conc. Source                       | Background Conc. Source |
|-------------------------|---------------------------------------------------------|------------------------------------------------------------|--------------------------------------------|-------------------------|
| OA                      | 849                                                     | 1.335                                                      | Akagi et al., 2012                         | GEOS-Chem               |
| <i>SVOC<sub>3</sub></i> | <i>103.4</i>                                            | -                                                          | <i>Grieshop et al. (2009a)<sup>b</sup></i> | -                       |
| <i>SVOC<sub>4</sub></i> | <i>144.2</i>                                            | -                                                          | <i>Grieshop et al. (2009a)</i>             | -                       |
| <i>SVOC<sub>5</sub></i> | <i>326.4</i>                                            | -                                                          | <i>Grieshop et al. (2009a)</i>             | -                       |
| <i>SVOC<sub>6</sub></i> | <i>228.5</i>                                            | -                                                          | <i>Grieshop et al. (2009a)</i>             | -                       |
| <i>SVOC<sub>7</sub></i> | <i>16.7</i>                                             | -                                                          | <i>Grieshop et al. (2009a)</i>             | -                       |
| <i>SVOC<sub>8</sub></i> | <i>29.8</i>                                             | -                                                          | <i>Akagi et al. (2011)<sup>c</sup></i>     | -                       |
| <i>CPD3<sup>d</sup></i> | -                                                       | <i>1.335</i>                                               | -                                          | <i>GEOS-Chem</i>        |
| BC                      | 187                                                     | 0.357                                                      | Akagi et al., 2012                         | GEOS-Chem               |
| K                       | 1.86                                                    | -                                                          | Amount needed to neutralize anions         | -                       |
| NH <sub>4</sub>         | 14.3                                                    | 1.291                                                      | Akagi et al., 2012                         | GEOS-Chem               |
| SO <sub>4</sub>         | 0.855                                                   | 6.603                                                      | Akagi et al., 2012                         | GEOS-Chem               |
| NO <sub>3</sub>         | 30.4                                                    | 0.174                                                      | Akagi et al., 2012                         | GEOS-Chem               |
| Cl                      | 11.9                                                    | -                                                          | Akagi et al., 2012                         | -                       |

<sup>a</sup>Values at the temperature and pressure of the plume (T = 288.4 K, P = 880 hPa)

<sup>b</sup> The POA volatility distribution of Grieshop et al. (2009a) is used for the relative total mass fractions of these species, as described in the text and shown in Table 1.

<sup>c</sup> Derived from the Akagi et al. (2011) estimate of the emissions of unidentified NMOCs in Savannah fire smoke, as described in the text and shown in Table 1.

<sup>d</sup>Extremely low volatility humic-like species, see Alvarado, 2008.
